# Supplementary material for: β-Lactam Pharmacokinetic/Pharmacodynamic Target Attainment in Intensive Care Unit Patients: A Prospective, Observational, Cohort Study
Source: MDPI journal article supplement (doi:10.3390/antibiotics12081289), 2023-08-05

## Title: $\beta$ -Lactam Pharmacokinetic/Pharmacodynamic Target Attainment in Intensive Care Unit Patients: A Prospective Observational Cohort Study

**Table S1.** Repartition of isolated pathogens according to antimicrobial agent and corresponding ECOFFs (Eucast Epidemiological Cut off).

| Isolated pathogens              | Cefepime, n<br>[ECOFF, mg/L] | Cefotaxime, n<br>[ECOFF, mg/L] | Ceftazidime, n<br>[ECOFF, mg/L] | Meropenem, n<br>[ECOFF, mg/L] | Total*, n (%) |
|---------------------------------|------------------------------|--------------------------------|---------------------------------|-------------------------------|---------------|
| <i>Citrobacter koseri</i>       | 2 [0.125]                    | 1 [NA]                         | -                               | -                             | 3 (2.0)       |
| <i>Enterobacter aerogenes</i>   | 7 [NA]                       | -                              | -                               | 1 [NA]                        | 8 (5.2)       |
| <i>Enterobacter cloacae</i>     | 9 [0.125]                    | 1 [0.5]                        | -                               | 1 [0.125]                     | 11 (7.2)      |
| <i>Enterococcus faecalis</i>    | 2 [ND]                       | -                              | -                               | -                             | 2 (1.3)       |
| <i>Enterococcus faecium</i>     | 1 [ND]                       | 2 [NA]                         | 1 [NA]                          | 2 [8]                         | 6 (3.9)       |
| <i>Escherichia coli</i>         | 6 [0.125]                    | 23 [0.25]                      | 3 [0.5]                         | 8 [0.125]                     | 40 (26.1)     |
| <i>Haemophilus influenzae</i>   | 1 [0.25]                     | -                              | 1 [0.5]                         | -                             | 2 (1.3)       |
| <i>Klebsiella pneumoniae</i>    | 3 [0.125]                    | 12 [0.25]                      | 6 [0.5]                         | -                             | 21 (13.7)     |
| <i>Klebsiella oxytoca</i>       | 1 [0.125]                    | -                              | -                               | -                             | 1 (0.65)      |
| <i>Morganella morganii</i>      | -                            | 1 [ND]                         | -                               | 1 [0.25]                      | 2 (1.3)       |
| <i>Pseudomonas aeruginosa</i>   | 5 [8]                        | 3 [32]                         | 16 [8]                          | 2 [2]                         | 26 (17.0)     |
| <i>Proteus mirabilis</i>        | 1 [0.125]                    | 2 [0.064]                      | -                               | -                             | 3 (2.0)       |
| <i>Serratia marcescens</i>      | 3 [0.125]                    | -                              | -                               | 1 [NA]                        | 4 (2.6)       |
| <i>Staphylococcus aureus</i>    | 1 [8]                        | 7 [4]                          | 1 [NA]                          | 1 [NA]                        | 10 (6.5)      |
| <i>Streptococcus pneumoniae</i> | -                            | 5 [0.064]                      | -                               | -                             | 5 (3.3)       |
| <i>Achromobacter xyloans</i>    | -                            | -                              | 1 [NA]                          | -                             | 1 (0.65)      |
| <i>Acinetobacter pittii</i>     | -                            | -                              | 1 [NA]                          | -                             | 1 (0.65)      |

|                                         |        |        |        |        |          |
|-----------------------------------------|--------|--------|--------|--------|----------|
| <i>Raoultella ornithicolithica</i>      | -      | -      | -      | 1 [NA] | 1 (0.65) |
| <i>Streptococcus constellatus</i>       | -      | 1 [NA] | 1 [NA] | -      | 2 (1.3)  |
| <i>Stenotrophomonas maltophilia</i>     | 2 [ND] | -      | 2 [ND] | -      | 4 (2.6)  |
| ND : not determined, NA : not available |        |        |        |        |          |

\*Some patients presented co-infection

**Table S2.** Target attainment at D1, D4 and D7, for documented infections (n=136).

|                    |            | Patient target attainment (%) |    |       |    |       |    |
|--------------------|------------|-------------------------------|----|-------|----|-------|----|
|                    |            | Day 1                         | n  | Day 4 | n  | Day 7 | n  |
| <b>Cefepime</b>    | underdosed | 39                            |    | 31    |    | 23    |    |
|                    | normodosed | 52                            | 31 | 55    | 29 | 54    | 22 |
|                    | overdosed  | 9                             |    | 14    |    | 23    |    |
| <b>Cefotaxime</b>  | underdosed | 4                             |    | 18    |    | 15    |    |
|                    | normodosed | 89                            | 47 | 82    | 40 | 85    | 26 |
|                    | overdosed  | 7                             |    | -     |    | -     |    |
| <b>Ceftazidime</b> | underdosed | 48                            |    | 50    |    | 26    |    |
|                    | normodosed | 32                            | 25 | 50    | 20 | 37    | 26 |
|                    | overdosed  | 20                            |    | -     |    | 37    |    |
| <b>Meropenem</b>   | underdosed | 16                            |    | 12    |    | 7     |    |
|                    | normodosed | 47                            | 19 | 53    | 17 | 65    | 14 |
|                    | overdosed  | 37                            |    | 35    |    | 28    |    |

**Table S3.** Covariates associated with target attainment in patient presented dosage adjustment or not (univariate analysis).

|                              | Patient target attainment | All patients at D1 n= 173 | <i>p</i> | Patients at D4* without dosage adjustment between D1 and D4, n=92 | n  | <i>p</i> | Patients at D4* with dosage adjustment between D1 and D4, n= 41 | n  | <i>p</i> | Patients at D7** without dosage adjustment between D4 and D7, n= 71 | n  | <i>p</i> | Patients at D7** with dosage adjustment between D4 and D7, n=29 | n  | <i>p</i> |
|------------------------------|---------------------------|---------------------------|----------|-------------------------------------------------------------------|----|----------|-----------------------------------------------------------------|----|----------|---------------------------------------------------------------------|----|----------|-----------------------------------------------------------------|----|----------|
| Weight                       | underdosed                | 73.0 (±15.1)              |          | 82,2 (±16,5)                                                      | 19 |          | 74,4 (±12,3)                                                    | 5  |          | 81,2 (±18,7)                                                        | 17 |          | 74,0 (±6,7)                                                     | 4  |          |
|                              | normodosed                | 75.8 (±12.9)              | 0.084    | 75,5 (±15,6)                                                      | 17 | 0,261    | 70,6 (±13,3)                                                    | 11 | 0.571    | 76,7 (±13,4)                                                        | 13 | 0.657    | 110 (±74,8)                                                     | 5  | 0.464    |
|                              | overdosed                 | 83.4 (±10.9)              |          | -                                                                 | 1  |          | -                                                               | 0  |          | -                                                                   | 0  |          | -                                                               | 1  |          |
| Hematocrite                  | underdosed                | 29.5 (±5.9)               |          | 29,3 (±4,2)                                                       | 45 |          | 31,4 (±6,6)                                                     | 16 |          | 30,4 (±6,4)                                                         | 33 |          | 28,3 (±4,6)                                                     | 12 |          |
|                              | normodosed                | 28.9 (±5.4)               | 0.399    | 28,0 (±5,7)                                                       | 41 | 0,175    | 29,1 (±4,1)                                                     | 20 | 0.457    | 28,9 (±3,7)                                                         | 30 | 0.760    | 26,8 (2,6)                                                      | 14 | 0.165    |
|                              | overdosed                 | 27.2 (±3.4)               |          | 28,6 (±4,5)                                                       | 5  |          | 27,5 (6,5)                                                      | 4  |          | 28,2 (±2,9)                                                         | 6  |          | 31,5 (±2,1)                                                     | 2  |          |
| Albuminemia                  | underdosed                | 28.7 (±4.9)               |          | 29,7 (±5,0)                                                       | 43 |          | 30,5 (±4,1)                                                     | 15 |          | 31,0 (±5,7)                                                         | 30 |          | 31,8 (±4,3)                                                     | 10 |          |
|                              | normodosed                | 28.2 (±5.4)               | 0.342    | 27,3 (±5,0)                                                       | 35 | 0,114    | 26,6 (±5,1)                                                     | 16 | 0.032    | 28,3 (±3,5)                                                         | 26 | 0.096    | 26,5 (±4,5)                                                     | 11 | 0.05     |
|                              | overdosed                 | 26.6 (±5.1)               |          | 28,3 (±1,2)                                                       | 5  |          | 26,2 (±3,4)                                                     | 3  |          | 27,0 (±7,1)                                                         | 5  |          | 29,9 (±0,8)                                                     | 2  |          |
| Creatinine                   | underdosed                | 59.2 (±34.8)              |          | 59,6 (±39,2)                                                      | 45 |          | 48,9 (±14,9)                                                    | 16 |          | 69,1 (±95,2)                                                        | 33 |          | 41,8 (±18,5)                                                    | 11 |          |
|                              | normodosed                | 86.8 (±52.1)              | <0.0001  | 82,2 (±77,0)                                                      | 42 | 0.001    | 91,2 (±80,5)                                                    | 19 | 0.009    | 84,5 (69,4)                                                         | 30 | 0.0009   | 80,5 (±70,0)                                                    | 14 | 0.144    |
|                              | overdosed                 | 174 (±115)                |          | 170 (±65,3)                                                       | 5  |          | 129 (±56,3)                                                     | 4  |          | 156 (±81,5)                                                         | 6  |          | 80,5 (±54,4)                                                    | 2  |          |
| Indexed creatinine clearance | underdosed                | 106.0 (±52.2)             |          | 90,3 (±41,5)                                                      | 33 |          | 97,3 (±39,0)                                                    | 13 |          | 87,7 (±50,0)                                                        | 23 |          | 78,5 (±31,1)                                                    | 7  |          |
|                              | normodosed                | 69.8 (±37.2)              | <0.0001  | 75,9 (±51,9)                                                      | 31 | 0.010    | 67,6 (±46,2)                                                    | 14 | 0.071    | 68,5 (±44,8)                                                        | 25 | 0.01     | 69,8 (±55,4)                                                    | 9  | 0,77     |
|                              | overdosed                 | 28.5 (±22.9)              |          | 21,6 (± 6,9)                                                      | 3  |          | 28,9 (±16,3)                                                    | 2  |          | 15,4 (±15,5)                                                        | 4  |          | 43,2 (±41,0)                                                    | 2  |          |

Data are presented as mean ±SD

\* Patients with concentration data at D1 and D4 (n=133)

\*\* Patients with concentration data at D4 and D7

(n=100)

**Table S4.** Covariates associated with target attainment (multivariate analysis).

|                              | Parameter Estimate [95% CI] | Standard error | p-value |
|------------------------------|-----------------------------|----------------|---------|
| Albuminemia                  | 0.023 [-0.082 ; 0.129]      | 0.054          | 0.6648  |
| Indexed creatinine clearance | 0.039 [ 0.017 ; 0.062]      | 0.012          | 0.0007  |
| Créatinine                   | -0.003 [-0.009 ; 0.004]     | 0.003          | 0.4016  |

**Table S5.** Protocol of  $\beta$ -Lactam administration.

| $\beta$ -Lactams   | Loading dose<br>(gr per 30 min) | Maintenance dose<br>(gr per day) |                                                              |                                                          |                                           |
|--------------------|---------------------------------|----------------------------------|--------------------------------------------------------------|----------------------------------------------------------|-------------------------------------------|
|                    |                                 | Normal renal function            | Moderate renal impairment<br>(CL <sub>CR</sub> 30-60 mL/min) | Severe renal impairment<br>(CL <sub>CR</sub> <30 mL/min) | Renal replacement therapy (RRT)           |
| <b>Cefepime</b>    | 2                               | 4                                | 1                                                            | 0.5                                                      | 4                                         |
| <b>Cefotaxime</b>  | 2                               | 6                                | 6                                                            | 1                                                        | 4                                         |
| <b>Ceftazidime</b> | 2                               | 6                                | 1                                                            | 0.5                                                      | 2 (4 for high dose, RRT $\geq$ 25mL/kg/h) |

|                                         |   |   |   |   |   |
|-----------------------------------------|---|---|---|---|---|
| <b>Meropenem</b>                        | 2 | 4 | 2 | 1 | 2 |
| <hr/>                                   |   |   |   |   |   |
| CL <sub>CR</sub> : creatinine clearance |   |   |   |   |   |
| <hr/>                                   |   |   |   |   |   |

**Table S6:** MIC threshold and  $\beta$ -Lactam defined target concentrations.

| Antibiotic         | Recommended target concentration | MIC threshold                        |
|--------------------|----------------------------------|--------------------------------------|
| <b>Cefotaxime</b>  | C <sub>ss</sub> = 20-60 mg/L     | 4 mg/L (ECOFF <i>S. aureus</i> )     |
| <b>Cefepime</b>    | C <sub>ss</sub> = 40-60 mg/L*    | 8 mg/L (ECOFF <i>P. aeruginosa</i> ) |
| <b>Ceftazidime</b> | C <sub>ss</sub> = 40-80 mg/L     | 8 mg/L (ECOFF <i>P. aeruginosa</i> ) |
| <b>Meropenem</b>   | C <sub>ss</sub> = 10-20 mg/L     | 2 mg/L (ECOFF <i>P. aeruginosa</i> ) |

C<sub>ss</sub>: target total steady state concentration following continuous administration

MIC: minimum inhibitory concentration

ECOFF: epidemiological cut-off (EUCAST. Available online: URL (accessed on 03/10/2018).  
[https://www.eucast.org/mic\\_and\\_zone\\_distributions\\_and\\_ecoffs](https://www.eucast.org/mic_and_zone_distributions_and_ecoffs), 12/2020)

\* A narrower therapeutic index was considered for cefepime due to its important neurotoxicity ability [23,28-29]

**Figure S1.** Evolution over time of target attainment (%) in the different groups: no dosage adjustment, adjustment D1-D4, adjustment D1-D4 and D4-D7, and adjustment D4-D7 (patients with concentration data at D1, D4 and D7; n=95).

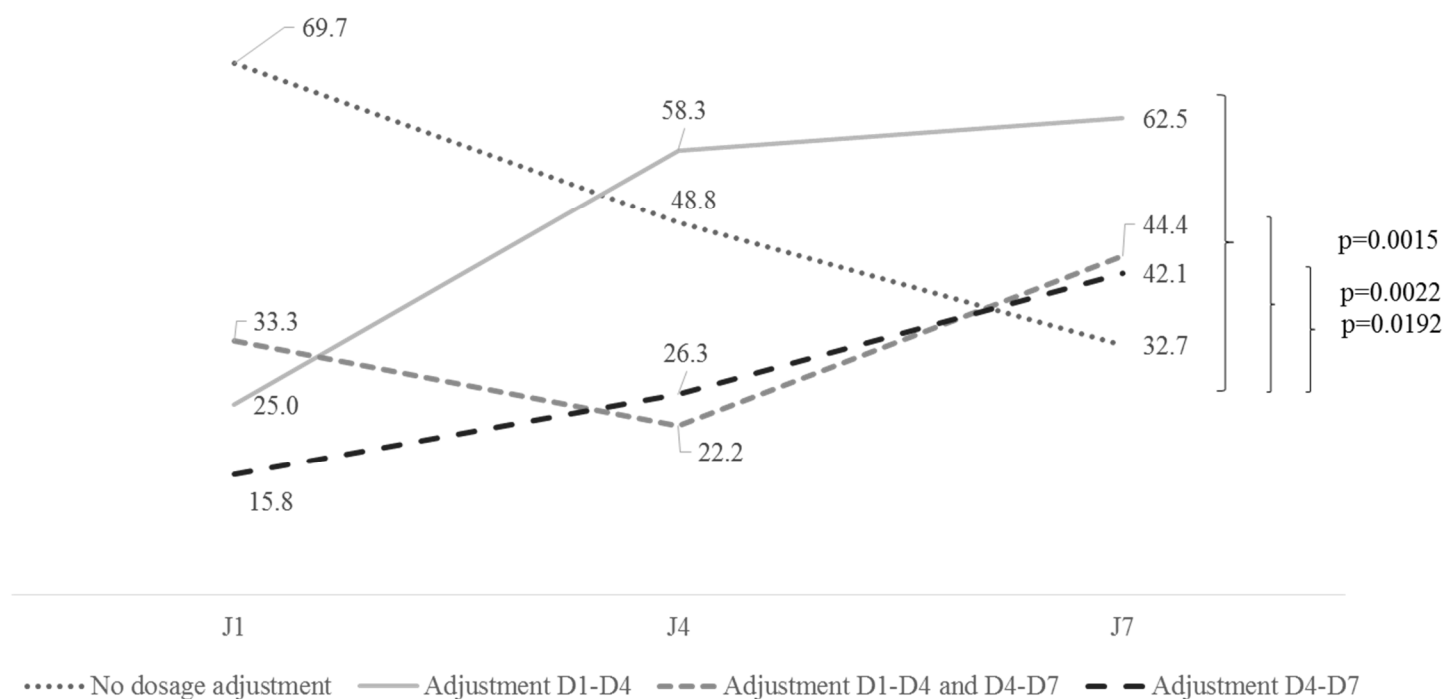

Supplement: s1 [file s1]
